1 **Individual differences in functional brain connectivity predict temporal discounting**  
2 **preference in the transition to adolescence**

3 Jeya Anandakumar\*<sup>1</sup>, Kathryn L. Mills\*<sup>2</sup>, Eric Earl<sup>1</sup>, Lourdes Irwin<sup>1</sup>, Oscar Miranda-  
4 Dominguez<sup>1</sup>, Damion V. Demeter<sup>5</sup>, Alexandra Walton-Weston<sup>1</sup>, Sarah Karalunas<sup>3</sup>, Joel Nigg<sup>3</sup>,  
5 Damien A. Fair<sup>1,3,4</sup>

6 <sup>1</sup> Department of Behavioral Neuroscience, Oregon Health & Science University, Portland, OR

7 <sup>2</sup> Department of Psychology, University of Oregon, Eugene, OR

8 <sup>3</sup> Department of Psychiatry, Oregon Health & Science University, Portland, OR

9 <sup>4</sup> Advanced Imaging Research Center, Oregon Health & Science University, Portland, OR

10 <sup>5</sup> Department of Psychology, University of Texas at Austin, Austin, TX

11

12 \*Contributed equally to this work

13

14

15 Corresponding Author:

16 Kathryn L. Mills

17 University of Oregon

18 115 Lewis Integrative Sciences

19 Eugene OR, 97403

20 Phone: 541 346 4905

21 Email: [kathryn.l.mills@gmail.com](mailto:kathryn.l.mills@gmail.com)

22

23 **Abstract**

24 The transition from childhood to adolescence is marked by distinct changes in behavior,  
25 including how one values waiting for a large reward compared to receiving an immediate, yet  
26 smaller, reward. While previous research has emphasized the relationship between this  
27 preference and age, it is also proposed that this behavior is related to circuitry between valuation  
28 and cognitive control systems. In this study, we examined how age and intrinsic functional  
29 connectivity strength within and between these neural systems relate to changes in discounting  
30 behavior across the transition into adolescence. We used mixed-effects modeling and linear  
31 regression to assess the contributions of age and connectivity strength in predicting discounting  
32 behavior. First, we identified relevant connections in a longitudinal sample of 64 individuals who  
33 completed MRI scans and behavioral assessments 2-3 times across ages 7-15 years (137 scans).  
34 We then repeated the analysis in a separate, cross-sectional, sample of 84 individuals (7-13  
35 years). Both samples showed an age-related increase in preference for waiting for larger rewards.  
36 Connectivity strength within and between valuation and cognitive control systems accounted for  
37 further variance not explained by age. These results suggest that individual differences in  
38 functional neural organization can account for behavioral changes typically associated with age.

39

40 **Keywords:** delay discounting, fMRI, intrinsic connectivity, longitudinal, resting state

41

42

43

## 44 **Introduction**

45 Temporal discounting (also known as inter-temporal choice or delay discounting) is the process  
46 of assessing the value of waiting for a future reward depending on the magnitude of the reward  
47 and the delayed time. Individuals vary in their temporal discounting behavior, with some having  
48 a stronger preference for taking a smaller immediate reward versus waiting for a larger reward,  
49 and vice versa (Sadaghiani & Kleinschmidt, 2013). Previous experimental studies suggest a  
50 positive relationship between chronological maturation (age) and the tendency to prefer waiting  
51 for the larger reward (de Water, Cillessen, & Scheres, 2014; Steinberg et al., 2009), although  
52 some studies have found evidence for a nonlinear relationship in the transition into adolescence  
53 (Scheres, Tontsch, Thoeny, & Sumiya, 2014). Interestingly, the development of temporal  
54 discounting with age may be a stable marker of liability for disinhibitory psychopathologies such  
55 as ADHD even when psychopathological symptoms change with age (Karalunas et al., 2017). It  
56 has been proposed that brain function and organization can explain individual differences in  
57 temporal discounting behavior (Christakou, Brammer, & Rubia, 2011; Hare, Hakimi, & Rangel,  
58 2014; Li et al., 2013; Scheres, de Water, & Mies, 2013; van den Bos, Rodriguez, Schweitzer, &  
59 McClure, 2014). Therefore, in this study, we analyzed how chronological maturation interacts  
60 with functional brain organization to predict temporal discounting.

61

### 62 *Temporal discounting as a measure of decision-making preference*

63 Tasks assessing temporal discounting behavior can be used to measure an individual's preference  
64 for a smaller-sooner reward (SSR) in comparison to a larger-later reward (LLR) (Green,  
65 Myerson, & Mcfadden, 1997). These tasks typically require individuals to choose between two  
66 rewards that vary in both the reward size and the delay time required until the amount is acquired

67 (Myerson & Green, 1995). For example, participants typically respond to several questions in the  
68 following format: “At the moment, what would you prefer?” Below the question two options are  
69 presented (e.g. “\$7.00 now”, “\$10 in 30 days”). The SSR and LLR vary in both delay interval  
70 and reward size over successive trials; this way, the subjective value of temporal reward can be  
71 measured. Individuals preferring the SSR are characterized to have steeper temporal discounting;  
72 conversely, individuals preferring the LLR are characterized to have less temporal discounting.  
73 One way to measure this subjective value of temporal reward is through the use of indifference  
74 points (the delay duration at which the magnitude of SSR equals the magnitude of LLR)  
75 (Richards, Zhang, Mitchell, & de Wit, 1999). The indifference points are useful in calculating a  
76 single index of discounting rate, and in determining the value of the delayed reward (Yi, Pitcock,  
77 Landes, & Bickel, 2010). Specifically, plotting the indifference points in a series yields a  
78 discount curve, which describes the rate at which the value of reward decreases as time is  
79 increased.

80

### 81 *Neural networks involved in temporal discounting*

82 Previous studies have shown that cortico-striatal circuitry is greatly involved in decision-making  
83 processes (Haber & Knutson, 2009), including temporal discounting (Peters & Büchel, 2011). In  
84 the present study, we focus on two cortico-striatal systems (defined *a priori*) that have been  
85 consistently correlated with different outcomes of an individual’s preference and value (Peters &  
86 Büchel, 2011; van den Bos et al., 2014): a valuation system (amygdala, medial orbitofrontal  
87 cortex, posterior cingulate cortex, ventromedial prefrontal cortex, and ventral striatum) and a  
88 cognitive control system (ventral lateral prefrontal cortex, dorsal anterior cingulate cortex,  
89 dorsolateral prefrontal cortex, dorsal striatum, and inferior frontal cortex) (See Figure 1a). We

90 also assessed connectivity between these networks and the supplementary motor area and  
91 hippocampus, given their involvement in intertemporal choice behavior (Peters & Büchel, 2010;  
92 Scheres et al., 2013; van den Bos et al., 2014). Overall, it has been theorized that adults with high  
93 temporal discounting preference are more likely to show greater recruitment of the control  
94 network and less recruitment of the valuation network when choosing a LLR over a SSR (van  
95 den Bos & McClure, 2013; Volkow & Baler, 2015).

96  
97 Neural networks involved in temporal discounting can be interrogated with MRI in multiple  
98 ways, including task-based fMRI studies in which participants are asked to make temporal  
99 discounting decisions, and as well as in studies that compare anatomical or functional  
100 connectivity to temporal discounting preferences measured outside of the scanner. Previous  
101 studies have examined structural connectivity (white matter fiber integrity) and its relation to  
102 temporal discounting through Diffusion Tensor Imaging (DTI). Increased structural connectivity  
103 between the striatum and cortical control regions have been found to be related to decreased  
104 temporal discounting, whereas increased structural connectivity between the striatum and  
105 subcortical valuation regions were related to increased temporal discounting in adults (van den  
106 Bos et al., 2014).

107  
108 While task-evoked brain activity can inform us on the functionality of cortical networks during  
109 specific contexts, intrinsic brain activity at rest can be used to measure an individual's functional  
110 brain organization. The intrinsic activity of the brain reflects, in part, past activities, and these  
111 fluctuations impact future behavior (Sadaghiani & Kleinschmidt, 2013). Brain functionality and  
112 fluctuations are believed to determine and shape connectivity patterns. Here we study the brain's

113 intrinsic connectivity using resting-state functional connectivity MRI (rs-fcMRI) (Power,  
114 Schlaggar, & Petersen, 2014). rs-fcMRI measures the functional relationship between regions  
115 while the participant is not performing a specific task by measuring slow, spontaneous  
116 fluctuation of the blood oxygen level dependent (BOLD) signal. Intrinsic activity measures  
117 reveal the cohesive connections and interactions present in neuronal networks (Boly et al., 2008).  
118 Previous studies in adults have found that intrinsic brain connectivity within cortico-striatal  
119 networks were related to an individual's temporal discounting preference (Calluso, Tosoni,  
120 Pezzulo, Spadone, & Committeri, 2015; Li et al., 2013).

121

### 122 *Development of neural networks underlying temporal discounting*

123 It is hypothesized that differential rates of maturation across cortico-striatal systems, and the  
124 protracted development of the interconnections between them, are related to changes in behavior  
125 across development (Casey, 2015; Costa Dias et al., 2012, 2015; van den Bos, Rodriguez,  
126 Schweitzer, & McClure, 2015). In adults, it has been theorized that greater recruitment of control  
127 networks (and less recruitment of the valuation networks) are indicative of choosing the LLR,  
128 however, it is currently unclear if this brain-behavior relationship is present throughout  
129 development. One of the first task-based fMRI studies of temporal discounting examined the  
130 impact of age-related (ages 12-32 years; males) changes in brain activation when deciding  
131 between a SSR and a LLR (Christakou et al., 2011). This study demonstrated that when choosing  
132 an immediate reward, *increased* recruitment of the vmPFC and *decreased* recruitment of the  
133 ventral striatum, insula, anterior cingulate, occipital, and parietal cortices was related to  
134 increasing age and preference for LLR. Further, greater coupling between the ventral striatum  
135 and vmPFC was also related to increasing age and preference for LLR, suggesting that increased

136 functional connectivity between the vmPFC and ventral striatum (regions of the valuation  
137 network) might be one neural mechanism underlying developmental changes in the preference  
138 for delayed rewards.

139  
140 Another theory is that neural systems involved in three cognitive processes: valuation (i.e., the  
141 value placed on a certain stimuli or outcome), cognitive control (i.e., engaging in goal-directed  
142 cognitive processes), and prospection (i.e., thinking about the future), are involved in the process  
143 of temporal discounting (Peters & Büchel, 2011). Using this framework, Banich et al. (2013)  
144 compared the behavioral and neural correlates of temporal discounting in younger (14-15 years)  
145 and older (17-19 years) adolescents, and how these measures related to an individual's self-  
146 reported tendency to think beyond the present. Behaviorally, older adolescents were more likely  
147 to choose a delayed reward over an immediate reward, and were slower than younger  
148 adolescents to choose the immediate reward (Banich et al., 2013). The pattern of brain activity  
149 related to intertemporal decision making was more distinct when choosing between immediate  
150 versus delayed rewards in the older adolescents compared to the younger adolescents (Banich et  
151 al., 2013). Across groups, individuals who reported a greater tendency to think beyond the  
152 present showed decreased recruitment of cognitive control regions during the temporal  
153 discounting task. These results suggest that both age and individual differences are related to the  
154 neural processing of temporal discounting.

155  
156 Another study found that greater white matter integrity in pathways connecting the frontal and  
157 temporal cortices with other areas of the brain were positively correlated with the preference for  
158 delayed rewards across ages 9-23 years (Olson et al., 2009). Some of these correlations were

159 developmentally related, whereas some of the effects appeared to be age-independent. For  
160 example, the relationship between greater white matter integrity in right frontal and left temporal  
161 regions and increased preference for delayed reward was not attributable to age. However, the  
162 relationship between integrity of white matter in left frontal, right temporal, right parietal (as  
163 well as some subcortical-cortical circuits) and the preference for delayed reward was age-related,  
164 as these white matter tracts also increased in integrity across the age range studied. These results  
165 show that both age and individual differences in neural circuitry are related to an individual's  
166 preference for immediate versus delayed rewards. Another study examined the relationship  
167 between temporal discounting and fronto-striatal circuitry in a longitudinal study of individuals  
168 between the ages of 8-26 (Achterberg, Peper, van Duijvenvoorde, Mandl, & Crone, 2016). This  
169 study found that preference for LLR increased non-linearly between childhood and early  
170 adulthood, and that greater fronto-striatal white matter integrity was related to the preference for  
171 LLR (Achterberg et al., 2016).

172  
173 Taken together, these studies demonstrate that people, on average, show increasing preference to  
174 wait for larger rewards rather than take immediate (smaller) rewards as they get older, but the  
175 increase may be nonlinear. Individual differences across development in temporal discounting  
176 preference are related to differences in functional neural organization. How one comes to choose  
177 a smaller immediate reward over a larger distant reward could be related to how that individual  
178 values the proposed reward, or it could be related to how well that individual can inhibit  
179 reflexive urges or the ability to think about the future. The development of brain systems  
180 involved in evaluating rewards, cognitive control, and thinking about the future all appear to



181 contribute to the developmental changes in how we process situations that involve us making a  
182 choice between an immediate outcome and a distant outcome.

183

#### 184 *Current study*

185 This current project examines how developmental changes in functional connectivity between  
186 and within the cognitive control network, valuation network, hippocampus and SMA relate to  
187 temporal discounting preferences during the transition into adolescence. Specifically, we tested  
188 to see if changes in functional connectivity strength could explain additional variance in  
189 temporal discounting preferences above chronological age. Previous studies have reported no  
190 significant difference in discounting behavior between boys and girls (Cross, Copping, &  
191 Campbell, 2011; Lee et al., 2013), suggesting any sex effects are likely to be small. Therefore, to  
192 conserve statistical power, the relationship between sex and temporal discounting behavior was  
193 not examined.

194

#### 195 **Methods**

##### 196 *Participants*

197 Our two neurotypical samples were drawn from an ongoing longitudinal project examining brain  
198 development in children, recruited from the community, with and without attention-  
199 deficit/hyperactivity disorder (ADHD). Our first sample consisted of 64 individuals with 2 or 3  
200 longitudinal scans each (n=137 scans) and our second cross-sectional sample consisted of 84  
201 individuals. Details for both samples are included in **Table 1**. All participants were typically-  
202 developing children without psychiatric diagnoses and exhibited typical neurological patterns of  
203 thoughts and behavior throughout the study. Psychiatric status was evaluated based on

204 evaluations with the Kiddie Schedule for Affective Disorders and Schizophrenia (KSADS; Puig-  
 205 Antich & Ryan, 1986) administered to a parent; parent and teacher Conners' Rating Scale-3rd  
 206 Edition (Conners, 2003); and a chart review a child psychiatrist and neuropsychologist that  
 207 required agreement. Any participant who was identified as having a current psychiatric,  
 208 neurological, or neurodevelopmental disorder was excluded from the present study. IQ was  
 209 estimated with a three-subtest short form (block design, vocabulary, and information) of the  
 210 Wechsler Intelligence Scale for Children, 4th Edition (Wechsler, 2003).

211

212 **Table 1.** Participant demographic characteristics for each sample.

|               | Longitudinal Sample Characteristics |              |               | Cross-sectional Sample Characteristics |               |               |
|---------------|-------------------------------------|--------------|---------------|----------------------------------------|---------------|---------------|
|               | All                                 | Female       | Male          | All                                    | Female        | Male          |
| N             | 64                                  | 23           | 41            | 84                                     | 42            | 42            |
| Age mean (SD) | 10.8 (1.83)                         | 10.6 (1.95)  | 10.9 (1.77)   | 10.3 (1.39)                            | 10.3 (1.34)   | 10.3 (1.44)   |
| Age range     | 7.3-15.7                            | 7.3-15.7     | 7.5-14.5      | 7.3-13.3                               | 8-13.3        | 7.2-13.2      |
| AUC mean (SD) | 0.51 (0.273)                        | 0.51 (0.261) | 0.51 (0.281)  | 0.45 (0.288)                           | 0.44 (0.306)  | 0.47 (0.273)  |
| AUC range     | 0.04 - 1                            | 0.07 - 0.99  | 0.04 - 1      | 0.02 - 0.98                            | 0.03 - 0.98   | 0.02 - 0.98   |
| IQ mean (SD)  | 115.3 (13.95)                       | 116.6 (9.58) | 114.6 (15.88) | 116.5 (13.82)                          | 114.5 (14.86) | 118.4 (12.59) |
| IQ range      | 72 - 144                            | 98 - 132     | 72 - 144      | 78 - 148                               | 78 - 144      | 96 - 148      |
| N visits      | 137                                 | 49           | 88            | 84                                     | 42            | 42            |
| 2 visits      | 55                                  | 20           | 35            | -                                      | -             | -             |
| 3 visits      | 9                                   | 3            | 6             | -                                      | -             | -             |

213

214 *Temporal Discounting task*

215 The temporal discounting task evaluates personal preference for a hypothetical delayed or  
 216 immediate reward. Participants were presented a computerized task with a series of questions,  
 217 and were read the following instruction before proceeding to the task:

218 *For the next task, you can choose between two options by clicking on it using the*  
219 *computer mouse. You can change your selection as often as you would like. Once you*  
220 *have decided which option you prefer, you can go on to the next question by clicking on*  
221 *the ‘next question’ box. One option will always be some amount of money available now.*  
222 *The other option will always be some amount of money later. The waiting period will*  
223 *vary between now and 180 days. Imagine that the choices you make are real– that if you*  
224 *choose ‘money now’ you would receive that amount of money at the end of the task and*  
225 *that if you choose ‘money later’ that you would actually have to wait before receiving the*  
226 *money. So, what are you going to do?*

227  
228 The computer-based task consisted of 92 questions with an option to get a reward immediately or  
229 get a larger amount of money (\$10.00) at a later time period. Most of the participants were  
230 presented delays in intervals of 7, 30, 90, 180 days; a small percent of the participant were  
231 presented with different delay intervals of 1, 7, 30, 90 days.

232  
233 Our temporal discounting task was analyzed by multivariate mathematical equations to measure  
234 an individual’s decision-making preference. Reward in relation to the time span is usually used  
235 to measure the preference of an individual or a collective population generalized by age.

236 There are many mathematical ways to analyze temporal discounting task, however, for this  
237 experiment we choose Area Under Curve (AUC). AUC (see **Box 1**) best represents the  
238 preference of the participants as it takes into consideration the indifference point and the  
239 corresponding delay time (Myerson, Green, & Warusawitharana, 2001). AUC is equated to best  
240 represent the variables present in this experiment; it takes into account the sum of indifference

241 and delay points acquired through temporal discounting, and outputs one value making it easier  
242 for analysis (Myerson et al., 2001).

243

244 Box 1. AUC Equation

$$AUC = \sum (x_2 - x_1) \left[ \frac{y_1 + y_2}{2} \right]$$

245

246

247 The  $x_2$  and  $x_1$  are the delayed points, and  $y_2$  and  $y_1$  represent the indifference points that  
248 correspond to the delays (Hamilton et al., 2015; Odum, 2011). The AUC outputs a signal value  
249 between 0 and 1; the lower the number represents the greater possibility to disregard the value of  
250 the reward, and have less tolerance for the delay time (Myerson et al., 2001; Odum, 2011). The  
251 AUC values and temporal discounting are inversely proportional, the closer the AUC value is to  
252 zero the more temporal discounting is present, therefore the participant is least likely to wait for  
253 a bigger reward. Likewise, the farther away the AUC value is to zero the most likely the  
254 participant is going to wait for the larger reward to be received at a later time.

255

256 Three validity criteria were applied to the quantification of AUC. The first criterion was to make  
257 sure that an indifference point for a specific delay was not greater than the preceding delay  
258 indifference point by more than 20% or \$2 (Johnson & Bickel, 2008). The next criterion was the  
259 requirement for the final indifference point, at 180 days, to be less than the first indifference  
260 point, at 0 days, to indicate variation in subjective value of rewards across (Johnson & Bickel,  
261 2008). The final criterion was to require the first, at 0 day, indifference point to be at least 9.25.  
262 This last criterion was enforced because a lower value indicates that the participant chose

263 multiple time to receive the smaller “now” over the larger “now”, suggesting poor task  
264 engagement of misunderstanding of the task (Mitchell, Wilson, & Karalunas, 2015).

265

### 266 *MRI acquisition*

267 MRI was acquired using a 3.0 Tesla Siemens Magnetom Tim Trio scanner with a twelve-channel  
268 head-coil at the Oregon Health & Science University Advanced Imaging Research Center. One  
269 high-resolution T1-weighted MPRAGE (TR=2300ms, TE=4ms, FOV=240x256mm, 1mm  
270 isotropic, sagittal acquisition) and multiple T2-weighted echo planar imaging (TR=2500ms,  
271 TE=30ms, FOV = 240x240mm, 3.8mm isotropic, either 82 or 120 volumes, axial acquisition,  
272 90° flip angle) series were acquired during each scan visit. Functional data were collected at rest,  
273 in an oblique plane (parallel to anterior commissure-posterior commissure plane), and steady  
274 state magnetization was assumed after five frames (~10s). Participants were instructed to stay  
275 still and fixate their gaze on a standard fixation-cross in the center of the display during the  
276 acquisition of resting state scans.

277

### 278 *Image processing*

279 The data were processed following the minimum processing steps outlined by the Human  
280 Connectome Project (Glasser et al., 2013), which included the use of FSL (Jenkinson,  
281 Beckmann, Behrens, Woolrich, & Smith, 2012; Smith et al., 2004; Woolrich et al., 2009) and  
282 FreeSurfer image analysis suite (<http://surfer.nmr.mgh.harvard.edu/>) (Dale, Fischl, & Sereno,  
283 1999; Fischl, Sereno, & Dale, 1999). With this method, gradient distortion corrected T1w and  
284 T2w volumes are first aligned to MNI’s AC-PC axis and then nonlinearly normalized to the MNI  
285 atlas. Next, the T1w and T2w volumes are re-registered using boundary based registration

286 (Greve & Fischl, 2009) to improve alignment. The brain of each individual is then segmented  
287 using the ‘recon-all’ FreeSurfer functions, which are further improved by utilizing the enhanced  
288 white matter-pial surface contrast of the T2w sequence. The initial pial surface is calculated by  
289 finding voxels that are beyond  $\pm 4$  standard deviations from the grey matter mean. The resulting  
290 parameter is then used to make sure no lightly myelinated grey matter is excluded. The estimated  
291 segmentation is refined further by eroding it with the T2w volume. Of the 221 total scan visits  
292 included in this study, 51 (23%) were processed without a T2w volume, either because this  
293 sequence was not acquired or was judged as being of low quality. These 51 were processed using  
294 FreeSurfer’s regular T1 segmentation algorithm (Fischl et al., 2002). Next, the preliminary pial  
295 surface and white matter surface are used to define an initial cortical ribbon. The original T1w  
296 volume is smoothed with the ribbon using a Gaussian filter with a sigma of 5mm. Then, the  
297 original T1w image is divided by the smoothed volume to account for low frequency spatial  
298 noise. This filtered volume is used to recalculate the pial surface, but now using 2 (instead of 4)  
299 standard deviations as threshold to define the pial surface. These segmentations are then used to  
300 generate an individualized 3D surface rendering of each individual, which is finally registered to  
301 the Conte 69 surface atlas as defined by the Human Connectome Project. This registration  
302 process allows all data types (cortical thickness, grey matter myelin content, sulcal depth,  
303 function activity, functional and structural, connectivity, etc.) to be aligned directly within and  
304 between individuals. All T1w and T2w MRI scans were quality controlled for any noticeable  
305 movement through visual inspection of raw and reconstructed images. The images were assessed  
306 in a pass or fail manner; scans that failed were excluded from the samples included in the present  
307 study.  
308

309 Functional EPI data are registered to the first volume using a 6-degrees of freedom linear  
310 registration and correcting for field distortions (using FSL's TOPUP), except for two scans (of  
311 221) where no field map had been acquired. Next the EPI volumes are averaged, with each  
312 volume of the original time series re-registered to the average EPI volume using a 6-degrees of  
313 freedom linear registration. This last step avoids biases due to a single frame being used, which  
314 may be confounded by variability of movement across a given run. The average EPI volume is  
315 then registered to the T1w volume. The matrices from each registration step are then combined,  
316 such that each frame can be registered to the atlas all in a single transform (i.e. only one  
317 interpolation).

318  
319 The resulting time-courses are then constrained by the grey matter segmentations and mapped  
320 into a standard space of 91,282 surface anchor points (greyordinates). This process accounts for  
321 potential partial voluming by limiting the influence of voxels that "straddle" grey and non-grey  
322 matter voxels (pial surface, white matter, ventricles, vessels, etc). Two thirds of the greyordinates  
323 are vertices (located in the cortical ribbon) while the remaining greyordinates are voxels within  
324 subcortical structures. Thus, the BOLD time courses in greyordinate space are the weighted  
325 average of the volume's time courses in grey matter, where the weights are determined by the  
326 average number of voxels wholly or partially within the grey matter ribbon. Voxels with a high  
327 coefficient of variation are excluded. Next, the surface time courses are downsampled to the  
328 greyordinate space after smoothing them with a 2mm full-width-half-max Gaussian filter.

329  
330 The additional preprocessing steps necessary for resting-state functional connectivity analyses  
331 consist of regressing out the whole brain (in this case the average signal across all greyordinates

332 (e.g., see Burgess et al., 2016), ventricle and white matter average signal, and displacement on  
333 the 6 motion parameters, their derivatives and their squares (Power, Mitra, et al., 2014). All  
334 regressors are individualized and specific to the participant, based on their own segmentations.  
335 The regression's coefficients (beta weights) are calculated solely on the frames where the frame  
336 displacement is below 0.3mm to reduce the influence of movement "outliers" on the output data,  
337 but all the time courses are regressed to preserve temporal order for temporal filtering. Finally,  
338 time courses are filtered using a first order Butterworth band pass filter with cutting frequencies  
339 of 9 millihertz and 80 millihertz.

340  
341 We applied a strict motion censoring procedure to the resting-state images (Fair, Nigg, et al.,  
342 2012; Power, Barnes, Snyder, Schlaggar, & Petersen, 2012) which takes the absolute value of the  
343 backward-difference for all rotation and translation measures in millimeters, assuming a brain  
344 radius of 50mm, and summates those absolute backward-differences for a measure of overall  
345 framewise displacement (FD). Volumes with a displacement exceeding 0.2mm were excluded,  
346 and we also removed frames with less than five contiguous frames of low motion data between  
347 instances of high motion ( $FD > 0.2\text{mm}$ ) data to confidently account for motion effects on  
348 adjacent volumes (Power, Mitra, et al., 2014). Only participants with greater than 5 minutes of  
349 high quality data were included in the present analysis. The mean framewise displacement of  
350 participants in the first sample was  $0.08 \pm 0.02\text{mm}$ ; range 0.05 - 0.13mm. The mean framewise  
351 displacement of participants in the second sample was  $0.09 \pm 0.02\text{mm}$ ; range 0.04 - 0.13mm.  
352 More information on the motion characteristics on the full sample (i.e. including those excluded)  
353 can be viewed in Dosenbach et al., (2017).

354



355 *Regions of interest*

356 Our regions of interest (ROIs) included regions within valuation and cognitive control systems,  
357 as well as hippocampus and supplementary motor area (SMA). For our cortical ROIs, we  
358 selected regions within each of these networks from the Desikan-Killiany atlas provided by  
359 FreeSurfer (Desikan et al., 2006). While other parcellations can be considered, we chose this  
360 parcellation in order to examine anatomically-defined cortical regions that have been identified  
361 in previous work. Cortical reconstruction and volumetric segmentation was performed with the  
362 FreeSurfer image analysis suite, which is documented and freely available for download online  
363 (<http://surfer.nmr.mgh.harvard.edu/>). The technical details of these procedures are described in  
364 prior publications (Dale et al., 1999; Fischl et al., 2002; Fischl & Dale, 2000). FreeSurfer uses  
365 individual cortical folding patterns to match cortical geometry across subjects (Fischl et al.,  
366 1999), and maps this parcellation of the cerebral cortex into units with respect to gyral and sulcal  
367 structure (Desikan et al., 2006; Fischl et al., 2004). Our striatal and subcortical ROIs were  
368 defined based on FreeSurfer's anatomical segmentation procedure. For the purposes of this study  
369 we examined the nucleus accumbens (NAcc), pallidum, amygdala, medial orbitofrontal cortex  
370 (mOFC), and posterior cingulate cortex (PCC) as part of the valuation network, and the caudate,  
371 putamen, anterior cingulate cortex (ACC), dorsal anterior cingulate cortex (dACC), dorsolateral  
372 prefrontal cortex (dlPFC), inferior frontal gyrus (IFG), and ventrolateral prefrontal cortex  
373 (vlPFC) of the cognitive control network (**Figure 1; SI Table 1**).

374

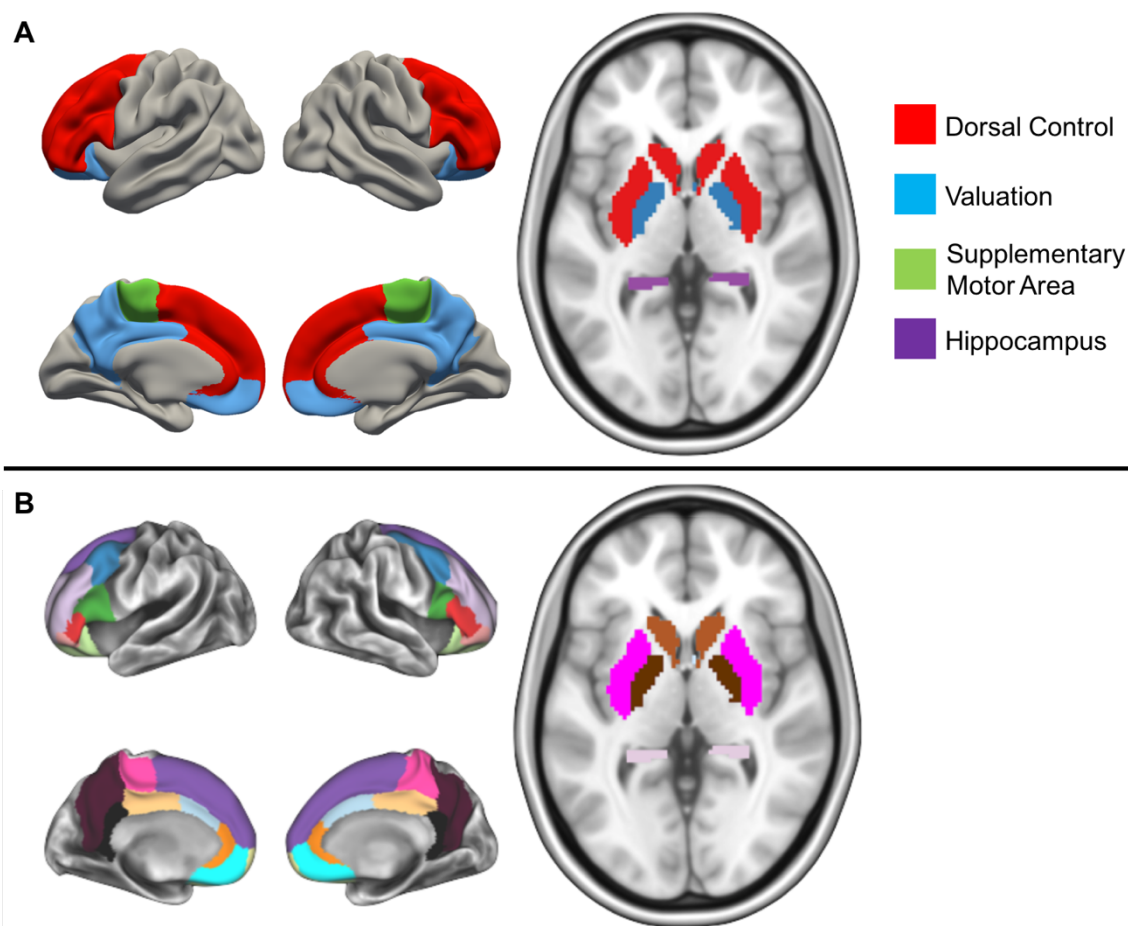

375

376 **Figure 1: Brain systems of interest and regions of interest.** [A] Brain networks (including two other  
377 regions out of the networks) included in this study. The regions in red represent the cognitive control  
378 network. The regions in blue represent the valuation network. The regions in green and purple represent  
379 the supplementary motor area and the hippocampus, respectively. [B] Each brain region included in this  
380 study.

381

382 *Statistical analysis*

383 In this study, we first tested to see whether chronological age could be used to predict temporal  
384 discounting preference as measured by AUC. We then tested to see if the strength of connectivity  
385 between each of our ROIs was able to explain variance in temporal discounting AUC values

386 above chronological age. All analyses were conducted in R version >3.3.3 ([https://www.r-](https://www.r-project.org/)  
387 [project.org/](https://www.r-project.org/)). The script we used to conduct these analyses is freely available online to facilitate  
388 reproducibility and replication efforts ([https://github.com/katemills/temporal\\_discounting](https://github.com/katemills/temporal_discounting)).

389

### 390 *Sample 1*

391 For our first, longitudinal, sample we tested each of these questions using mixed-effects models  
392 with the nlme package implemented through R. Mixed effects modeling accounts for the non-  
393 independence of the data collected from the same individual over time, and allows for unequal  
394 spacing between data collection points. This statistical analysis contains both the average slope  
395 and intercepts of the parameter (fixed effects), and varying intercept for each individual that is a  
396 random deviation of the fixed effect (random effect). We tested the following three polynomial  
397 models to predict AUC from chronological age:

398 Linear age model:  $y = \beta_0 + \beta_1(x)$

399 Quadratic age model:  $y = \beta_0 + \beta_1(x) + \beta_2(x^2)$

400 Cubic age model:  $y = \beta_0 + \beta_1(x) + \beta_2(x^2) + \beta_3(x^3)$

401 Where  $y$  is the AUC value, and  $\beta_0$  represents the intercept;  $x$  represents the participant's age;  
402 and  $\beta_1, \beta_2$  and  $\beta_3$  represent regression coefficients. We centered age for all analyses (10.70  
403 years). The three age models were compared and tested against a null model that only included  
404 the random intercept for each individual. The best fitting model was determined by Akaike  
405 Information Criterion (AIC) and likelihood ratio (LR) statistics using the heuristic of parsimony.  
406 The model with the lowest AIC value that was significantly different ( $p < .05$ ), as determined  
407 from LR tests, from less complex models was chosen.

408

409 To identify the connections that could predict an individual's AUC score above chronological  
410 age, we used LR statistics to compare models including a connection of interest (COI)  
411 correlation coefficient as an interaction and/or main effect added to the age only model. These  
412 brain connectivity models were then compared against each other as well as the best fitting age  
413 model. The model with the lowest AIC value that was significantly different ( $p < .01$ ) from less  
414 complex models was selected as the best fitting model. To account for the possibility that brain  
415 connectivity alone could account for more variance in AUC values than the age-only model or  
416 the multivariate models, we also tested to see if a model including the COI correlation  
417 coefficient, but not age, was the best fitting model. We identified connectivity-only models if  
418 they had lower AIC than the age only models, and were also both significantly different and had  
419 lower AIC than the other more complex models.

420

#### 421 *Sample 2*

422 We examined the same questions in the second sample to test the replicability of the results  
423 obtained from the first sample. Similar to our first sample, we first examined the relationship  
424 between AUC and chronological age, specifically by comparing linear to nonlinear models  
425 (quadratic & cubic). Since these data were cross-sectional, we used regular linear regression to  
426 fit these models and compared models through F tests ( $p < .05$ ). Age was centered for all analyses  
427 (10.23 years). Once the best age model was determined, we tested if adding COI correlation  
428 coefficients to the model would improve the model fit through F tests ( $p < .05$ ). We only  
429 examined the COIs that were determined to explain additional variance in AUC above age in the  
430 first sample.

431

## 432 Results

### 433 *AUC increases from late childhood into early adolescence*

434 Model comparisons between the null, linear age, quadratic age, and cubic age models are  
435 presented in **Table 2**. Of the three age models tested, the quadratic model best represented the  
436 relationship between age and AUC in this longitudinal sample (LR quadratic model vs. null:  
437 13.2,  $p < .002$ ). The results of this model suggest that, on average, each yearly increase in age  
438 across this sample was associated with an increase of 0.04 AUC, with a negative rate of change  
439 (-0.01) (**Table 3; Figure 2**). These results should be interpreted from the predicted intercept at  
440 age 10.70 years (0.55). The graph illustrates a group-level increase in AUC until age ~11 years,  
441 but relative stability in AUC between ages 11-14 years.

442

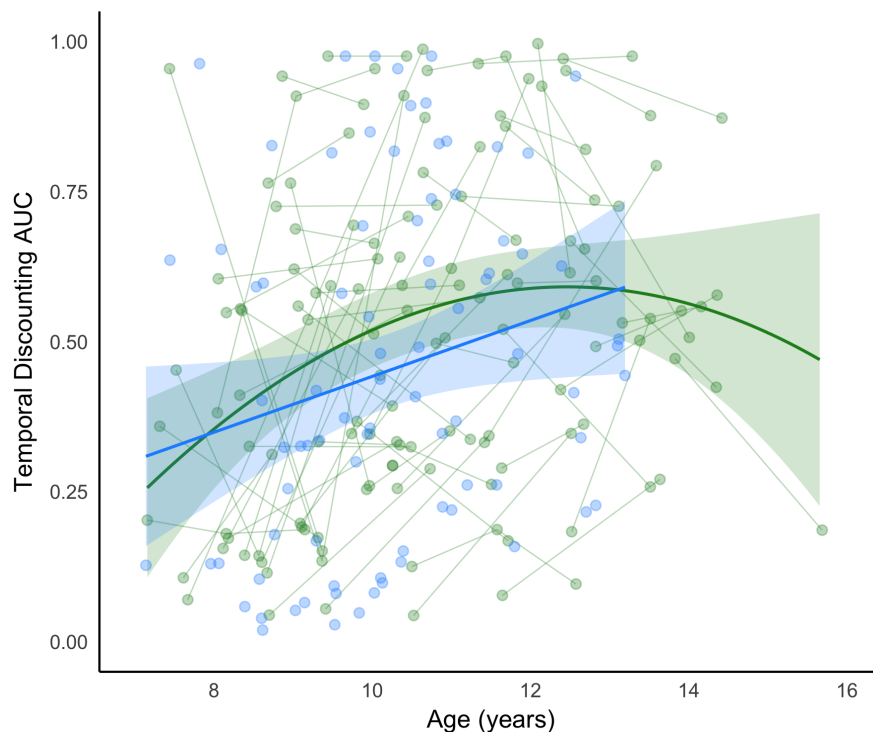

443

444 **Figure 2: Best fitting age models for AUC.** The green line represents the predicted model fit for AUC  
445 for sample 1 (longitudinal sample) and the blue line represents the predicted model fit for AUC for

446 sample 2 (cross-sectional sample). Shading represents the 95% confidence intervals. Raw data are plotted  
 447 in the background, with each individual measurement representing a circle, and lines connecting data  
 448 collected from the same individual across time.

449  
 450 In our second, cross-sectional, sample, we found evidence for a linear relationship between age  
 451 and AUC (**Figure 2**; blue). The linear model for this sample suggests that, on average, each  
 452 yearly increase in age across this sample was associated with an increase of 0.05 AUC (**Table 3**;  
 453 **Figure 2**). These results should be interpreted from the predicted intercept at age 10.23 years  
 454 (0.45). Overall, the graph shows a similar increase in AUC across the age period studied as is  
 455 visible in the longitudinal sample.

456

457 **Table 2.** Comparison of polynomial age models for the longitudinal sample.

| <b>Longitudinal sample</b> |      |    |      |      |        |        |         |         |
|----------------------------|------|----|------|------|--------|--------|---------|---------|
|                            | Mode | df | AIC  | BIC  | logLik | Test   | L.Ratio | p-value |
| Null Model                 | 1    | 3  | 25.0 | 33.7 | -9.5   |        |         |         |
| Linear Age                 | 2    | 4  | 18.8 | 30.4 | -5.4   | 1 vs 2 | 8.2     | 0.0042  |
| Quadratic Age              | 3    | 5  | 15.8 | 30.4 | -2.9   | 2 vs 3 | 5.0     | 0.0257  |
| Cubic Age                  | 4    | 6  | 15.4 | 32.9 | -1.7   | 3 vs 4 | 2.4     | 0.1226  |

458  
 459 **Table 3.** Fixed effects for best fitting (quadratic) age model predicting AUC for the longitudinal  
 460 sample.

| <b>Longitudinal Sample</b> |       |            |    |         |         |
|----------------------------|-------|------------|----|---------|---------|
|                            | Value | Std. Error | DF | t-value | p-value |
| Intercept                  | 0.55  | 0.03       | 71 | 17.0    | <0.0001 |
| Linear age                 | 0.04  | 0.01       | 71 | 3.2     | 0.0021  |
| Quadratic age              | -0.01 | 0.01       | 71 | -2.2    | 0.0291  |

461

462 *Brain connectivity explains variance in AUC not accounted for by age*

463 In the first sample, we found that AUC was best predicted by models including both age and  
464 connectivity for fifty-eight COIs (**SI Table 2**). Many of the connections (40%) were between  
465 regions within the cognitive control network, whereas 10% of connections were between regions  
466 within the valuation network. 36% of the connections were between the cognitive control  
467 network regions and the valuation network regions. None of the identified connections included  
468 connections between the control network and the SMA or the hippocampus, however, one  
469 connection between the valuation network and hippocampus and three connections between the  
470 valuation and the SMA were identified as relevant to predicting AUC. All four possible  
471 connections between the SMA and hippocampus were identified as relevant to predicting AUC.

472  
473 Of the fifty-eight connections identified in the first sample, only nine were replicated in the  
474 cross-sectional sample (**Table 4; Figure 3**). Three of the nine connections represented  
475 connections within regions of the cognitive control system (left dlPFC – right dACC; bilateral  
476 dlPFC; bilateral superior frontal cortex); three represented connections within regions of the  
477 valuation system (right pallidum – left PCC; right pallidum – right PCC; right mOFC – left  
478 amygdala); and three represented connections between these two systems (left dlPFC – right  
479 PCC; left superior frontal cortex – right PCC; left mOFC – right vlPFC). Model statistics for  
480 these nine models are detailed for both the longitudinal sample and cross-sectional sample in  
481 **Table 4**.

482  
483 The majority of the identified connections showed similar effects across samples. The three  
484 connections within the cognitive control system impacted the prediction of AUC similarly in  
485 both samples: individuals with greater connectivity strength between these cognitive control

486 regions were predicted to have a preference for LLR (higher AUC) across the age ranges studied.

487 The beta values for the main effect of connectivity were similar across the samples as well, with

488 connectivity beta estimates ranging from 0.26 – 0.37 for the longitudinal sample, and 0.30 – 0.42

489 for the cross-sectional sample.

490

491 The three connections within the valuation system also impacted the prediction of AUC similarly

492 in both samples: individuals with greater connectivity strength between these valuation regions

493 were predicted to have a preference for the SSR (lower AUC) across the age ranges studied. The

494 beta values for the main effect of connectivity were similar across the samples as well, with

495 connectivity beta estimates ranging from -0.38 – -0.23 for the longitudinal sample, and -0.58 – -

496 0.27 for the cross-sectional sample. The impact of connectivity between the right pallidum and

497 PCC on predicting AUC with age was virtually identical for both cortical hemispheres.

498

499 Individuals with greater connectivity strength between the left mOFC and right vIPFC were

500 predicted to have a preference for LLR (higher AUC) across the age ranges studied, similar to

501 patterns found for connections between the cognitive control regions. Connectivity between

502 these two regions was a better predictor of AUC than age alone in the cross-sectional sample.

503 Within the longitudinal sample, connectivity strength between the right PCC and the left dlPFC

504 or left superior frontal cortex interacted with the quadratic age term to predict AUC, with

505 stronger connectivity strength predicting a preference for LLR (higher AUC) only at the tail ends

506 of the age range. Within the cross-sectional sample, participants greater connectivity strength

507 between the right PCC and left dlPFC were predicted to have a preference for LLR (higher

508 AUC). Connectivity between the right PCC and left superior frontal cortex was a better predictor



509 of AUC than age alone in the cross-sectional sample, with individual with greater connectivity  
510 strength between these regions having a preference for LLR (higher AUC).

**Table 4.** Best fitting model characteristics for the nine connections of interest that replicated across the both samples.

|                                                              |                       | Longitudinal sample   |                                    |           |                |                          |                             |                            |                                   |
|--------------------------------------------------------------|-----------------------|-----------------------|------------------------------------|-----------|----------------|--------------------------|-----------------------------|----------------------------|-----------------------------------|
| Connection                                                   | Networks              | Best Fit Model        | LR test                            | AIC diff. | Intercept (SE) | Linear age Estimate (SE) | Quadratic age Estimate (SE) | Connectivity Estimate (SE) | Quadratic age x Connectivity (SE) |
| Left dIPFC – Right dACC                                      | Control – Control     | main effect           | $X^2(1) = 7.13$ ,<br>$p = 0.0076$  | 5.13      | 0.59 (0.03)    | 0.05 (0.01)              | -0.01 (0.01)                | 0.26 (0.1)                 | -                                 |
| Left dIPFC – Right dIPFC                                     | Control – Control     | main effect           | $X^2(1) = 8.68$ ,<br>$p = 0.0032$  | 6.68      | 0.4 (0.06)     | 0.05 (0.01)              | -0.01 (0.01)                | 0.36 (0.12)                | -                                 |
| Left Superior Frontal Cortex – Right Superior Frontal Cortex | Control – Control     | main effect           | $X^2(1) = 8.95$ ,<br>$p = 0.0028$  | 6.95      | 0.36 (0.07)    | 0.05 (0.01)              | -0.01 (0.01)                | 0.37 (0.12)                | -                                 |
| Right Pallidum – Right PCC                                   | Valuation – Valuation | main effect           | $X^2(1) = 8.27$ ,<br>$p = 0.004$   | 6.27      | 0.56 (0.03)    | 0.05 (0.01)              | -0.01 (0.01)                | -0.34 (0.11)               | -                                 |
| Right Pallidum – Left PCC                                    | Valuation – Valuation | main effect           | $X^2(1) = 8.74$ ,<br>$p = 0.0031$  | 6.74      | 0.54 (0.03)    | 0.05 (0.01)              | -0.01 (0.01)                | -0.38 (0.12)               | -                                 |
| Right mOFC – Left Amygdala                                   | Valuation – Valuation | quadratic interaction | $X^2(2) = 9.97$ ,<br>$p = 0.0069$  | 5.97      | 0.59 (0.04)    | 0.04 (0.01)              | -0.02 (0.01)                | -0.23 (0.15)               | 0.09 (0.03)                       |
| Left dIPFC – Right PCC                                       | Control – Valuation   | quadratic interaction | $X^2(2) = 11.44$ ,<br>$p = 0.0033$ | 7.44      | 0.54 (0.03)    | 0.06 (0.01)              | -0.01 (0.01)                | -0.08 (0.11)               | 0.1 (0.03)                        |
| Left Superior Frontal Cortex – Right PCC                     | Control – Valuation   | quadratic interaction | $X^2(2) = 9.9$ ,<br>$p = 0.0071$   | 5.9       | 0.55 (0.03)    | 0.06 (0.01)              | -0.01 (0.01)                | -0.2 (0.12)                | 0.1 (0.03)                        |
| Left mOFC – Right vIPFC                                      | Valuation – Control   | main effect           | $X^2(1) = 7.13$ ,<br>$p = 0.0076$  | 5.13      | 0.51 (0.04)    | 0.04 (0.01)              | -0.01 (0.01)                | 0.27 (0.1)                 | -                                 |

| Connection                                                   | Networks              | Cross-sectional sample |                                    |          |                |                 |                   |
|--------------------------------------------------------------|-----------------------|------------------------|------------------------------------|----------|----------------|-----------------|-------------------|
|                                                              |                       | Best Fit Model         | F test                             | adj R Sq | Intercept (SE) | Linear age (SE) | Connectivity (SE) |
| Left dlPFC – Right dACC                                      | Control – Control     | main effect            | $F(2,81) = 5.13$ ,<br>$p = 0.0203$ | 0.09     | 0.51 (0.04)    | 0.05 (0.02)     | 0.3 (0.13)        |
| Left dlPFC – Right dlPFC                                     | Control – Control     | main effect            | $F(2,81) = 4.99$ ,<br>$p = 0.0233$ | 0.09     | 0.28 (0.08)    | 0.05 (0.02)     | 0.42 (0.18)       |
| Left Superior Frontal Cortex – Right Superior Frontal Cortex | Control – Control     | main effect            | $F(2,81) = 4.92$ ,<br>$p = 0.025$  | 0.09     | 0.25 (0.1)     | 0.05 (0.02)     | 0.40 (0.18)       |
| Right Pallidum – Right PCC                                   | Valuation – Valuation | main effect            | $F(2,81) = 6.21$ ,<br>$p = 0.007$  | 0.11     | 0.46 (0.03)    | 0.04 (0.02)     | -0.53 (0.19)      |
| Right Pallidum – Left PCC                                    | Valuation – Valuation | main effect            | $F(2,81) = 6.72$ ,<br>$p = 0.0043$ | 0.12     | 0.45 (0.03)    | 0.05 (0.02)     | -0.58 (0.2)       |
| Right mOFC – Left Amygdala                                   | Valuation – Valuation | main effect            | $F(2,81) = 4.62$ ,<br>$p = 0.0342$ | 0.08     | 0.47 (0.03)    | 0.05 (0.02)     | -0.27 (0.12)      |
| Left dlPFC – Right PCC                                       | Control – Valuation   | main effect            | $F(2,81) = 4.4$ ,<br>$p = 0.043$   | 0.08     | 0.48 (0.03)    | 0.05 (0.02)     | 0.28 (0.14)       |
| Left Superior Frontal Cortex – Right PCC                     | Control – Valuation   | coi only               | $F(1,82) = 6.18$ ,<br>$p = 0.015$  | 0.06     | 0.44 (0.03)    | -               | 0.37 (0.15)       |
| Left mOFC – Right vlPFC                                      | Valuation – Control   | coi only               | $F(1,82) = 6.27$ ,<br>$p = 0.0142$ | 0.06     | 0.41 (0.03)    | -               | 0.35 (0.14)       |

## 511 **Discussion**

512 In this study, we investigated whether individual differences in functional brain organization are  
513 associated with temporal discounting preferences in the transition into adolescence. Specifically,  
514 we tested if functional connectivity between regions involved in valuation, cognitive control,  
515 hippocampus and SMA could explain variance in temporal discounting preference (AUC) above  
516 chronological age. To ensure validity of our reported results, we tested these models in two  
517 independent datasets: a longitudinal dataset of children aged 7-15 years and a cross-sectional  
518 dataset of 7-13 year olds.

519  
520 In both samples we observed a group-average increase in AUC between late childhood and early  
521 adolescence. We found evidence that the relationship between age and AUC was best  
522 represented by a quadratic trajectory in our longitudinal sample, with AUC increasing between  
523 ages 7-11 years before stabilizing. For the cross-sectional sample, we identified a linear increase  
524 in AUC between ages 7-13 years. While the best fitting model differed between these samples,  
525 the overall pattern observed in both samples reflected a general trend for our participants to  
526 prefer waiting for a later, larger reward (LLR) as they got older.

527  
528 This result supports the general finding that temporal discounting preferences shift in the  
529 transition into adolescence (Achterberg et al., 2016; Scheres et al., 2014). Scheres et al., (2014)  
530 demonstrated in a cross-sectional sample encompassing ages 6-19 years that adolescents were  
531 more likely to wait for the LLR in comparison to children and young adults. Achterberg et al.,  
532 (2016) similarly found that the ability to delay gratification increased from childhood into  
533 adolescence. It is important to note that, although we found a group-average increase in AUC

534 across the transition into adolescence, there was substantial individual variability (see **Figure 2**).  
535 Further, because our sample age range ends at 15 years we cannot be sure if the preference for  
536 LLR declines between mid-to-late adolescence.

537  
538 *Individual differences in functional connectivity are related to temporal discounting preference*  
539 The current study proposed that individual variability in temporal discounting preference could  
540 be explained by differences in intrinsic functional organization. To test this hypothesis, we  
541 examined if intrinsic functional connectivity between a set of *a priori* regions of interest and  
542 networks could improve the “age only” models in predicting an individual’s temporal  
543 discounting preference. To mitigate false positives and overfitting, we implemented both a  
544 stringent model selection procedure utilizing AIC as well as Likelihood Ratio tests paired with  
545 replication in an independent sample. We found nine distinct brain connections were able to  
546 explain variance in temporal discounting preference above age alone in both our longitudinal and  
547 cross-sectional samples. These findings suggest that individual differences in functional brain  
548 connectivity can explain a portion of individual variability in temporal discounting preferences  
549 during the transition to adolescence.

550  
551 Our results demonstrate that individuals with greater connectivity between cortical regions  
552 within cognitive control systems are more inclined to choose LLR. Specifically, we found that  
553 increased connectivity between the left dIPFC and the right dACC, bilateral dIPFC, and bilateral  
554 superior frontal cortex, relate to a preference for LLR for individuals across the transition into  
555 adolescence (**Figure 3a-c**).

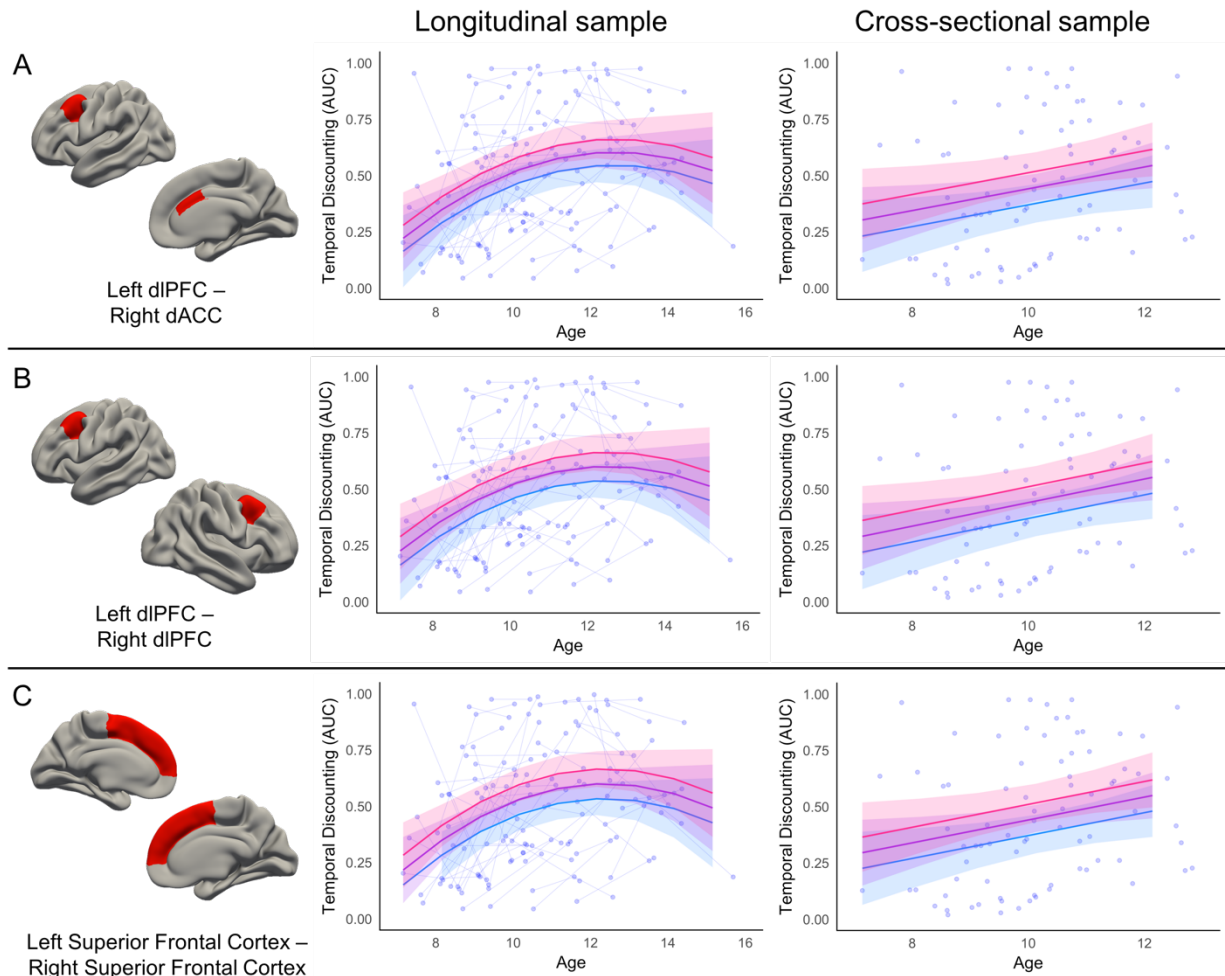

556

557 **Figure 3a-c: Relationship between cognitive control regions and AUC.** The cortical regions involved  
558 in the connectivity between two cognitive control systems are represented by red on the brain. Pink  
559 trajectory represents AUC for an individual with 1 standard deviation higher connectivity than the mean  
560 between the two regions. Purple trajectory represents predicted AUC for participants with the mean  
561 connectivity strength between the two regions. Blue trajectory represents AUC for an individual with 1  
562 standard deviation lower connectivity than the mean between the two regions. Raw data are plotted in the  
563 background, with each individual measurement representing a circle, and lines connecting data collected  
564 from the same individual across time.

565

566

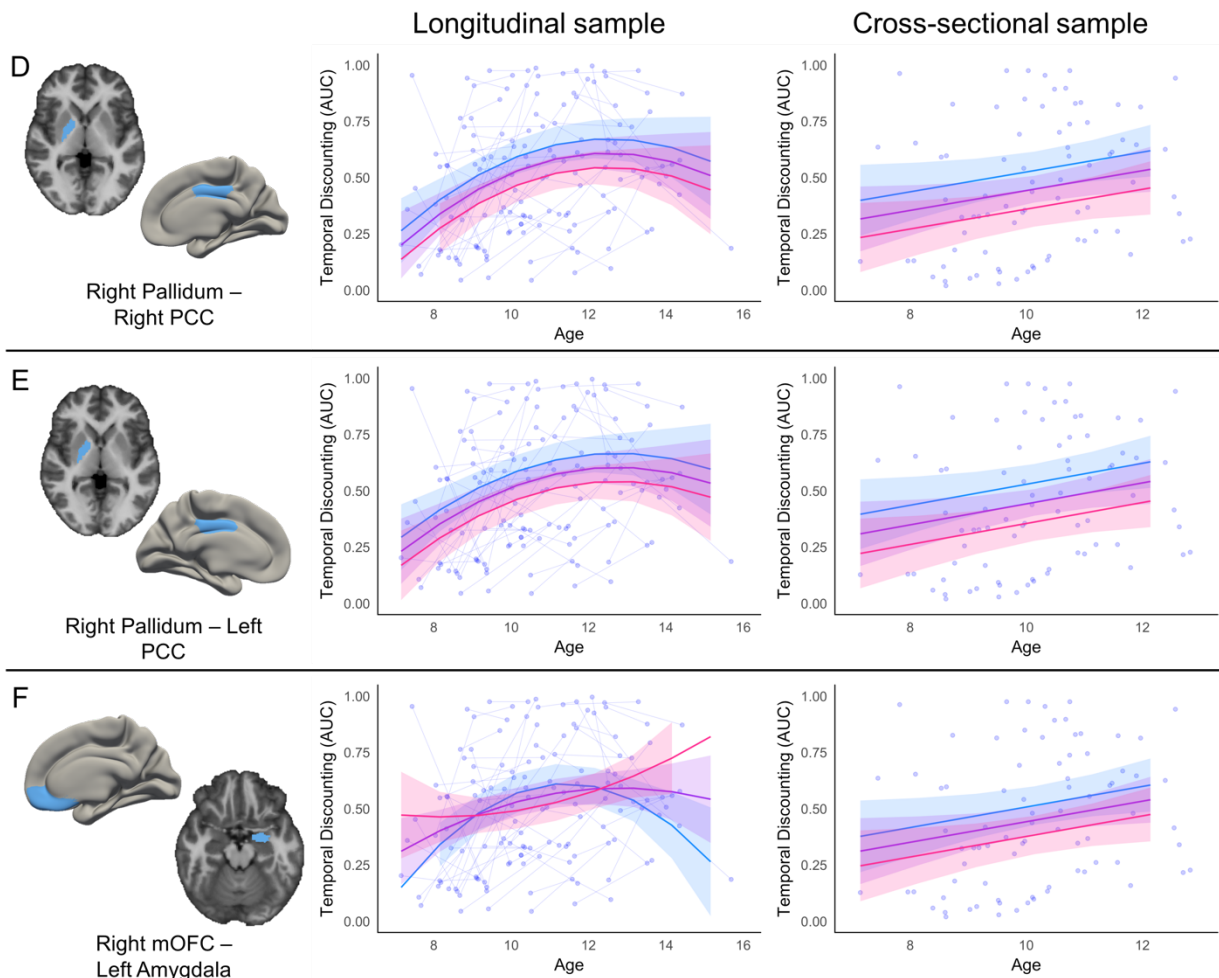

567

568 **Figure 3d-f: Relationship between valuation regions and AUC.** The regions, between cortical and

569 subcortical, involved in the connectivity between two valuation systems are represented by blue on the

570 brain. Pink trajectory represents AUC for an individual with 1 standard deviation higher connectivity than

571 the mean between the two regions. Purple trajectory represents predicted AUC for participants with the

572 mean connectivity strength between the two regions. Blue trajectory represents AUC for an individual

573 with 1 standard deviation lower connectivity than the mean between the two regions. Raw data are plotted

574 in the background, with each individual measurement representing a circle, and lines connecting data

575 collected from the same individual across time.

576

577

578 Across samples, we found evidence that greater connectivity between right pallidum and the  
579 bilateral PCC was associated with a preference for SSR across the transition into adolescence.  
580 Specifically, a greater connectivity between these valuation regions predicted lower AUC for  
581 individuals across the age ranges studied (**Figure 3de**). These results align with previous  
582 findings showing individual differences in cortico-striatal circuitry are related to temporal  
583 discounting preferences (van den Bos et al., 2014; 2015). Our results also demonstrate that  
584 increased connectivity between the left amygdala and right mOFC was related to increased  
585 preference for the SSR in the transition to adolescence (**Figure 3f**). While a main effect was  
586 found for the cross-sectional sample, there was an interaction between connectivity and the  
587 quadratic age term for the longitudinal sample. This presents the possibility that the relationship  
588 between increased connectivity between the left amygdala and right mOFC and temporal  
589 discounting preference is not static across ages 7-15 years.  
590



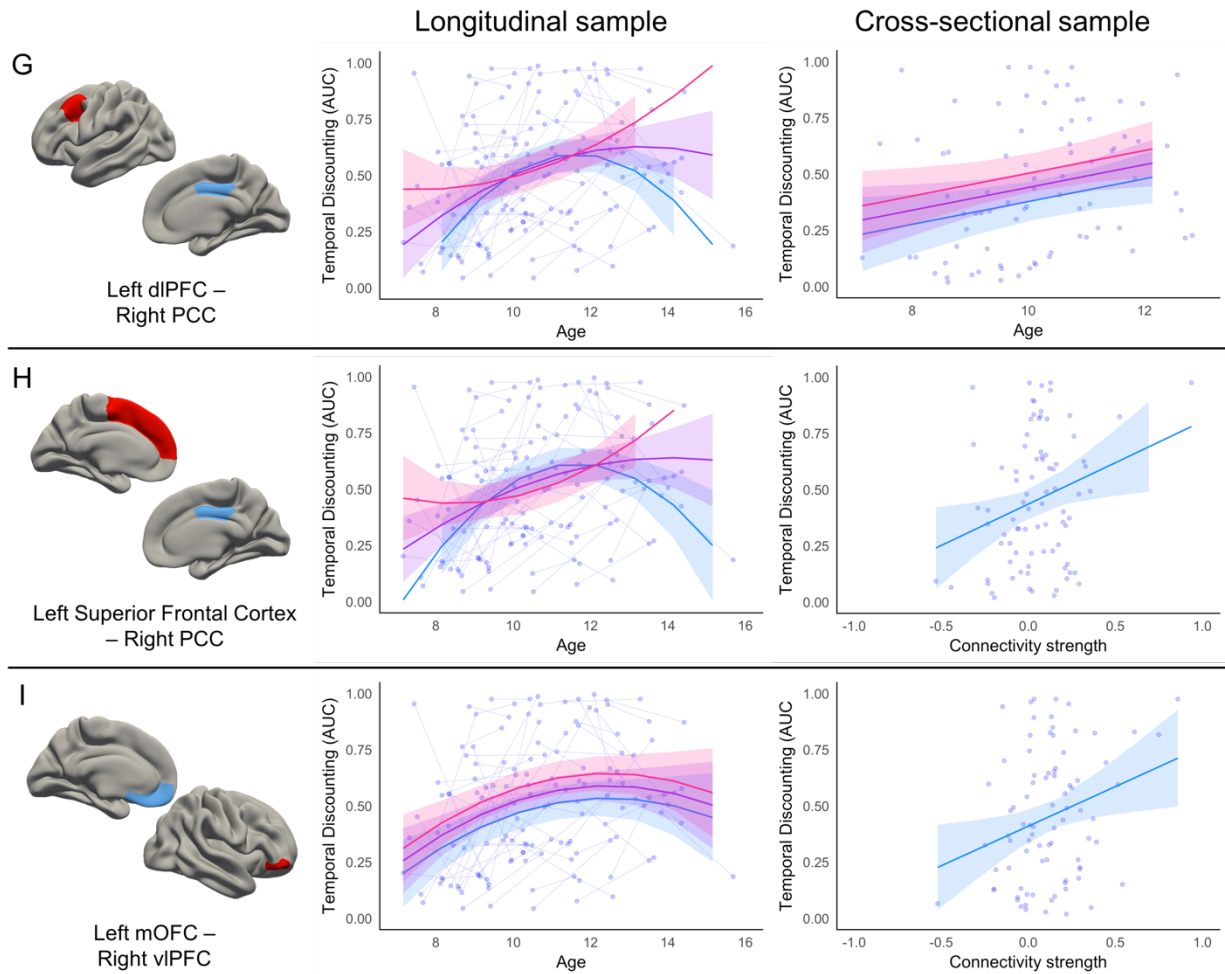

591

592 **Figure 3g-i: Relationship between valuation network and cognitive control network and AUC.** The

593 cortical regions involved in the connectivity between valuation system and cognitive control system are

594 represented by blue and red, respectively, on the brain. The Pink trajectory represents AUC for an

595 individual with 1 standard deviation higher connectivity than the mean between the two regions. Purple

596 trajectory represents predicted AUC for participants with the mean connectivity strength between the two

597 regions. Blue trajectory represents AUC for an individual with 1 standard deviation lower connectivity

598 than the mean between the two regions. Raw data are plotted in the background, with each individual

599 measurement representing a circle, and lines connecting data collected from the same individual

600 time.

601

602 While we found evidence that increased connectivity between the right PCC and the left dlPFC  
603 or left superior frontal cortex was related to greater preference for LLR for individuals across  
604 ages in the cross-sectional sample, the best fitting models in the longitudinal sample suggested a  
605 nonlinear relationship between this strength of these connections and AUC preference across age  
606 (**Figure 3gh**). We found that greater connectivity between the left mOFC to right vlPFC (the  
607 pars orbitalis region of the inferior frontal gyrus) was related to increased preference for LLR  
608 across the transition into adolescence. This possibly reflects that stronger functional connectivity  
609 at rest between these regions reflects the ability for the vlPFC/IFG to regulate mOFC signaling  
610 (Hare, Camerer, & Rangel, 2009). In both samples, a main effect of greater connectivity between  
611 the dlPFC and several regions predicted higher AUC (increased preference for LLR or less  
612 discounting) for individuals across the transition into adolescence. This result held for  
613 connections between the dlPFC and dACC, bilateral dlPFC, as well as dlPFC and PCC, further  
614 underscoring the role of dlPFC in the development of temporal discounting behavior (Wang et  
615 al., 2017).

616

### 617 *Role of dopaminergic signaling in temporal discounting behavior*

618 All of the identified relevant connections between regions of the valuation network (amygdala,  
619 mOFC, PCC, and pallidum) showed a negative relationship with AUC, with stronger  
620 connectivity predicting a greater preference for SSR across participants. This could be related to  
621 the abundance of dopaminergic signaling in the valuation network. Multiple studies have shown  
622 that areas of the brain with dopaminergic innervation are involved in temporal discounting  
623 preference (Kobayashi & Schultz, 2008; Pine, Shiner, Seymour, & Dolan, 2010). Furthermore, it  
624 has been reported that individuals with increased dopamine release are more inclined to choose

625 the SSR (Joutsa et al., 2015). Crossover work in animal models might allow for direct testing of  
626 this hypothesis (Grayson & Fair, 2017; Grayson, Kroenke, Neuringer, & Fair, 2014; Miranda-  
627 Dominguez et al., 2014; Stafford et al., 2014).

628  
629 One hypothesis is that changes in the cortico-striatal circuitry that occur in the transition into  
630 adolescence are related to hormonal changes that affect the interaction within the networks  
631 (Blakemore, Burnett, & Dahl, 2010; Chambers, Taylor, & Potenza, 2003). Specifically, these  
632 hormonal changes impact and influence motivation towards reward seeking behaviors (Luciana  
633 & Collins, 2012). Pubertal hormones and neurotransmitters, such as sex hormones and  
634 dopamine, affect regions across the brain, but their effects (especially dopamine) on the vmPFC,  
635 NAcc, and caudate might influence the development of cognitive capacities such as abstract  
636 thinking, problem solving, and working memory (Chambers et al., 2003).

637  
638 *Limitations and Future directions*

639 This study examined temporal discounting preference as it relates to biological measures.  
640 However, social environmental factors can impact an individual's subjective value of money and  
641 preference for waiting for a LLR. For example, a previous study found that individuals who grew  
642 up in lower socio-economic status environments (SES) preferred SSR, whereas individuals who  
643 grew up in higher SES environments preferred LLR (Griskevicius et al., 2013). In an  
644 experimental manipulation, Kidd, Palmeri, & Aslin (2013) demonstrated that children presented  
645 with a reliable environment demonstrated a significant increase in their delay time compared to  
646 children presented with an unstable environment. It should not be assumed that steeper  
647 discounting is always maladaptive. Very low socio-economic status populations were under-

648 represented in the current study. Future investigations should assess how social environmental  
649 factors might impact the relationship between biological measures and temporal discounting  
650 preference.

651  
652 Previous studies have shown evidence for heterogeneity in functional connectivity existing  
653 across individuals in typically developing as well as in clinical samples (Costa Dias et al., 2015;  
654 Fair, Bathula, Nikolas, & Nigg, 2012; Gates, Molenaar, Iyer, Nigg, & Fair, 2014). For example,  
655 graph theory and community detection can be used to classify typically developing children into  
656 specific neuropsychological subgroups (Gates et al., 2014), and functional subgroups can be  
657 differentiated based on heterogeneity related to behavioral characteristics including impulsivity  
658 (Costa Dias et al., 2015). This study did not account for these heterogeneity present in the group  
659 and further investigation should be considerate of this phenomenon. Further, the current study  
660 utilized a brain parcellation based on anatomical boundaries (the Desikan-Killiany atlas; Desikan  
661 et al., 2006) in order to test hypotheses generated from previous work. However, establishing the  
662 consistency of these findings with other parcellations (Glasser et al., 2016; Gordon et al., 2016)  
663 will be an important next step (Grayson & Fair, 2017; Hagmann, Grant, & Fair, 2012).

664  
665 *Conclusion*

666 On average, children start to prefer waiting for later, larger rewards as they transition into  
667 adolescence. However, there is a substantial amount of variability in temporal discounting  
668 preference between individuals across development. This study provides evidence that individual  
669 differences in functional brain connectivity within and between regions in cognitive control and  
670 valuation networks can account for variance in temporal discounting preference above age.

671 Specifically, greater connectivity strength between cognitive control regions, as well as between  
672 cognitive control and valuation regions, was related to a preference for waiting for a larger  
673 reward. In contrast, greater connectivity strength between valuation network regions was related  
674 to a preference for taking an immediate, smaller, reward. Future studies should examine the  
675 impact of social environmental factors on the relationship between functional brain connectivity  
676 and temporal discounting behavior across development.

677

### 678 **Funding**

679 This research was supported by R01 MH107418 (Mills, PI: Pfeifer), DeStefano Innovation Fund  
680 (Fair), R01 MH096773 (Fair), MH099064 (Nigg), MH086654 (MPI: Fair, Nigg), and  
681 MH086654 (Nigg).

682

### 683 **Acknowledgements**

684 We would like to thank the participants and families for their ongoing participation in this study,  
685 as well as the many staff involved in administrative tasks and data collection of this project.

686

687

## 688 **References**

- 689 Achterberg, M., Peper, J. S., van Duijvenvoorde, A. C. K., Mandl, R. C. W., & Crone, E. A.  
690 (2016). Frontostriatal White Matter Integrity Predicts Development of Delay of Gratification: A  
691 Longitudinal Study. *The Journal of Neuroscience: The Official Journal of the Society for*  
692 *Neuroscience*, 36(6), 1954–1961. <https://doi.org/10.1523/JNEUROSCI.3459-15.2016>
- 693 Banich, M. T., De La Vega, A., Andrews-Hanna, J. R., Mackiewicz Seghete, K., Du, Y., &  
694 Claus, E. D. (2013). Developmental trends and individual differences in brain systems involved  
695 in intertemporal choice during adolescence. *Psychology of Addictive Behaviors: Journal of the*  
696 *Society of Psychologists in Addictive Behaviors*, 27(2), 416–430.  
697 <https://doi.org/10.1037/a0031991>
- 698 Blakemore, S.-J., Burnett, S., & Dahl, R. E. (2010). The role of puberty in the developing  
699 adolescent brain. *Human Brain Mapping*, 31(6), 926–933. <https://doi.org/10.1002/hbm.21052>
- 700 Boly, M., Phillips, C., Tshibanda, L., Vanhaudenhuyse, A., Schabus, M., Dang-Vu, T. T., ...  
701 Laureys, S. (2008). Intrinsic brain activity in altered states of consciousness: how conscious is  
702 the default mode of brain function? *Annals of the New York Academy of Sciences*, 1129, 119–  
703 129. <https://doi.org/10.1196/annals.1417.015>
- 704 Burgess, G. C., Kandala, S., Nolan, D., Laumann, T. O., Power, J. D., Adeyemo, B., ... Barch,  
705 D. M. (2016). Evaluation of Denoising Strategies to Address Motion-Related Artifacts in  
706 Resting-State Functional Magnetic Resonance Imaging Data from the Human Connectome  
707 Project. *Brain Connectivity*, 6(9), 669–680. <https://doi.org/10.1089/brain.2016.0435>
- 708 Calluso, C., Tosoni, A., Pezzulo, G., Spadone, S., & Committeri, G. (2015). Interindividual  
709 Variability in Functional Connectivity as Long-Term Correlate of Temporal Discounting. *PLOS*  
710 *ONE*, 10(3), e0119710. <https://doi.org/10.1371/journal.pone.0119710>
- 711 Casey, B. J. (2015). Beyond simple models of self-control to circuit-based accounts of  
712 adolescent behavior. *Annual Review of Psychology*, 66, 295–319.  
713 <https://doi.org/10.1146/annurev-psych-010814-015156>
- 714 Chambers, R. A., Taylor, J. R., & Potenza, M. N. (2003). Developmental neurocircuitry of  
715 motivation in adolescence: a critical period of addiction vulnerability. *The American Journal of*  
716 *Psychiatry*, 160(6), 1041–1052.
- 717 Christakou, A., Brammer, M., & Rubia, K. (2011). Maturation of limbic corticostriatal activation  
718 and connectivity associated with developmental changes in temporal discounting. *NeuroImage*,  
719 54(2), 1344–1354. <https://doi.org/10.1016/j.neuroimage.2010.08.067>
- 720 Conners, C. K. (2003). *Conners' rating scales: Revised technical manual*. New York, NY:

- 721 Multi-Health Systems. Retrieved from <https://www.mhs.com/MHS->  
722 [Assessment?prodname=conners3](https://www.mhs.com/MHS-Assessment?prodname=conners3)
- 723 Costa Dias, T. G., Iyer, S. P., Carpenter, S. D., Cary, R. P., Wilson, V. B., Mitchell, S. H., ...  
724 Fair, D. A. (2015). Characterizing heterogeneity in children with and without ADHD based on  
725 reward system connectivity. *Developmental Cognitive Neuroscience, 11*, 155–174.  
726 <https://doi.org/10.1016/j.dcn.2014.12.005>
- 727 Costa Dias, T. G., Wilson, V. B., Bathula, D. R., Iyer, S. P., Mills, K. L., Thurlow, B. L., ... Fair,  
728 D. A. (2012). Reward circuit connectivity relates to delay discounting in children with attention-  
729 deficit/hyperactivity disorder. *European Neuropsychopharmacology: The Journal of the*  
730 *European College of Neuropsychopharmacology*.  
731 <https://doi.org/10.1016/j.euroneuro.2012.10.015>
- 732 Cross, C. P., Copping, L. T., & Campbell, A. (2011). Sex differences in impulsivity: a meta-  
733 analysis. *Psychological Bulletin, 137*(1), 97–130. <https://doi.org/10.1037/a0021591>
- 734 Dale, A. M., Fischl, B., & Sereno, M. I. (1999). Cortical Surface-Based Analysis: I.  
735 Segmentation and Surface Reconstruction. *NeuroImage, 9*(2), 179–194.  
736 <https://doi.org/10.1006/nimg.1998.0395>
- 737 de Water, E., Cillessen, A. H. N., & Scheres, A. (2014). Distinct age-related differences in  
738 temporal discounting and risk taking in adolescents and young adults. *Child Development, 85*(5),  
739 1881–1897. <https://doi.org/10.1111/cdev.12245>
- 740 Desikan, R. S., Ségonne, F., Fischl, B., Quinn, B. T., Dickerson, B. C., Blacker, D., ... Killiany,  
741 R. J. (2006). An automated labeling system for subdividing the human cerebral cortex on MRI  
742 scans into gyral based regions of interest. *NeuroImage, 31*(3), 968–980.  
743 <https://doi.org/10.1016/j.neuroimage.2006.01.021>
- 744 Dosenbach, N. U. F., Koller, J. M., Earl, E. A., Miranda-Dominguez, O., Klein, R. L., Van, A.  
745 N., ... Fair, D. A. (2017). Real-time motion analytics during brain MRI improve data quality and  
746 reduce costs. *NeuroImage, 161*, 80–93. <https://doi.org/10.1016/j.neuroimage.2017.08.025>
- 747 Fair, D. A., Bathula, D., Nikolas, M. A., & Nigg, J. T. (2012). Distinct neuropsychological  
748 subgroups in typically developing youth inform heterogeneity in children with ADHD.  
749 *Proceedings of the National Academy of Sciences of the United States of America, 109*(17),  
750 6769–6774. <https://doi.org/10.1073/pnas.1115365109>
- 751 Fair, D. A., Nigg, J. T., Iyer, S., Bathula, D., Mills, K. L., Dosenbach, N. U. F., ... Milham, M.  
752 P. (2012). Distinct neural signatures detected for ADHD subtypes after controlling for micro-  
753 movements in resting state functional connectivity MRI data. *Frontiers in Systems Neuroscience,*  
754 *6*, 80. <https://doi.org/10.3389/fnsys.2012.00080>



- 755 Fischl, B., & Dale, A. M. (2000). Measuring the thickness of the human cerebral cortex from  
756 magnetic resonance images. *Proceedings of the National Academy of Sciences*, *97*(20), 11050–  
757 11055. <https://doi.org/10.1073/pnas.200033797>
- 758 Fischl, B., Salat, D. H., Busa, E., Albert, M., Dieterich, M., Haselgrove, C., ... Dale, A. M.  
759 (2002). Whole brain segmentation: automated labeling of neuroanatomical structures in the  
760 human brain. *Neuron*, *33*(3), 341–355.
- 761 Fischl, B., Sereno, M. I., & Dale, A. M. (1999). Cortical surface-based analysis. II: Inflation,  
762 flattening, and a surface-based coordinate system. *NeuroImage*, *9*(2), 195–207.  
763 <https://doi.org/10.1006/nimg.1998.0396>
- 764 Fischl, B., van der Kouwe, A., Destrieux, C., Halgren, E., Ségonne, F., Salat, D. H., ... Dale, A.  
765 M. (2004). Automatically parcellating the human cerebral cortex. *Cerebral Cortex (New York,*  
766 *N.Y.: 1991)*, *14*(1), 11–22.
- 767 Gates, K. M., Molenaar, P. C. M., Iyer, S. P., Nigg, J. T., & Fair, D. A. (2014). Organizing  
768 heterogeneous samples using community detection of GIMME-derived resting state functional  
769 networks. *PloS One*, *9*(3), e91322. <https://doi.org/10.1371/journal.pone.0091322>
- 770 Glasser, M. F., Coalson, T. S., Robinson, E. C., Hacker, C. D., Harwell, J., Yacoub, E., ... Van  
771 Essen, D. C. (2016). A multi-modal parcellation of human cerebral cortex. *Nature*, *536*(7615),  
772 171–178. <https://doi.org/10.1038/nature18933>
- 773 Glasser, M. F., Sotiropoulos, S. N., Wilson, J. A., Coalson, T. S., Fischl, B., Andersson, J. L., ...  
774 Jenkinson, M. (2013). The minimal preprocessing pipelines for the Human Connectome Project.  
775 *NeuroImage*, *80*(Supplement C), 105–124. <https://doi.org/10.1016/j.neuroimage.2013.04.127>
- 776 Gordon, E. M., Laumann, T. O., Adeyemo, B., Huckins, J. F., Kelley, W. M., & Petersen, S. E.  
777 (2016). Generation and Evaluation of a Cortical Area Parcellation from Resting-State  
778 Correlations. *Cerebral Cortex (New York, N.Y.: 1991)*, *26*(1), 288–303.  
779 <https://doi.org/10.1093/cercor/bhu239>
- 780 Grayson, D. S., & Fair, D. A. (2017). Development of large-scale functional networks from birth  
781 to adulthood: A guide to the neuroimaging literature. *NeuroImage*, *160*, 15–31.  
782 <https://doi.org/10.1016/j.neuroimage.2017.01.079>
- 783 Grayson, D. S., Kroenke, C. D., Neuringer, M., & Fair, D. A. (2014). Dietary omega-3 fatty  
784 acids modulate large-scale systems organization in the rhesus macaque brain. *The Journal of*  
785 *Neuroscience: The Official Journal of the Society for Neuroscience*, *34*(6), 2065–2074.  
786 <https://doi.org/10.1523/JNEUROSCI.3038-13.2014>
- 787 Green, L., Myerson, J., & Mcfadden, E. (1997). Rate of temporal discounting decreases with



- 788 amount of reward. *Memory & Cognition*, 25(5), 715–723. <https://doi.org/10.3758/BF03211314>
- 789 Greve, D. N., & Fischl, B. (2009). Accurate and robust brain image alignment using boundary-  
790 based registration. *NeuroImage*, 48(1), 63–72. <https://doi.org/10.1016/j.neuroimage.2009.06.060>
- 791 Griskevicius, V., Ackerman, J. M., Cantú, S. M., Delton, A. W., Robertson, T. E., Simpson, J.  
792 A., ... Tybur, J. M. (2013). When the economy falters, do people spend or save? Responses to  
793 resource scarcity depend on childhood environments. *Psychological Science*, 24(2), 197–205.  
794 <https://doi.org/10.1177/0956797612451471>
- 795 Haber, S. N., & Knutson, B. (2009). The Reward Circuit: Linking Primate Anatomy and Human  
796 Imaging. *Neuropsychopharmacology*, 35(1), 4–26. <https://doi.org/10.1038/npp.2009.129>
- 797 Hagmann, P., Grant, P. E., & Fair, D. A. (2012). MR connectomics: a conceptual framework for  
798 studying the developing brain. *Frontiers in Systems Neuroscience*, 6, 43.  
799 <https://doi.org/10.3389/fnsys.2012.00043>
- 800 Hamilton, K. R., Mitchell, M. R., Wing, V. C., Balodis, I. M., Bickel, W. K., Fillmore, M., ...  
801 Moeller, F. G. (2015). Choice impulsivity: Definitions, measurement issues, and clinical  
802 implications. *Personality Disorders*, 6(2), 182–198. <https://doi.org/10.1037/per0000099>
- 803 Hare, T. A., Camerer, C. F., & Rangel, A. (2009). Self-Control in Decision-Making Involves  
804 Modulation of the vmPFC Valuation System. *Science*, 324(5927), 646–648.  
805 <https://doi.org/10.1126/science.1168450>
- 806 Hare, T. A., Hakimi, S., & Rangel, A. (2014). Activity in dlPFC and its effective connectivity to  
807 vmPFC are associated with temporal discounting. *Frontiers in Neuroscience*, 8.  
808 <https://doi.org/10.3389/fnins.2014.00050>
- 809 Jenkinson, M., Beckmann, C. F., Behrens, T. E. J., Woolrich, M. W., & Smith, S. M. (2012).  
810 FSL. *NeuroImage*, 62(2), 782–790. <https://doi.org/10.1016/j.neuroimage.2011.09.015>
- 811 Johnson, M. W., & Bickel, W. K. (2008). An algorithm for identifying nonsystematic delay-  
812 discounting data. *Experimental and Clinical Psychopharmacology*, 16(3), 264–274.  
813 <https://doi.org/10.1037/1064-1297.16.3.264>
- 814 Joutsa, J., Voon, V., Johansson, J., Niemelä, S., Bergman, J., & Kaasinen, V. (2015).  
815 Dopaminergic function and intertemporal choice. *Translational Psychiatry*, 5, e491.  
816 <https://doi.org/10.1038/tp.2014.133>
- 817 Karalunas, S. L., Gustafsson, H. C., Dieckmann, N. F., Tipsord, J., Mitchell, S. H., & Nigg, J. T.  
818 (2017). Heterogeneity in development of aspects of working memory predicts longitudinal  
819 attention deficit hyperactivity disorder symptom change. *Journal of Abnormal Psychology*,

- 820 126(6), 774–792. <https://doi.org/10.1037/abn0000292>
- 821 Kidd, C., Palmeri, H., & Aslin, R. N. (2013). Rational snacking: young children’s decision-  
822 making on the marshmallow task is moderated by beliefs about environmental reliability.  
823 *Cognition*, 126(1), 109–114. <https://doi.org/10.1016/j.cognition.2012.08.004>
- 824 Kobayashi, S., & Schultz, W. (2008). Influence of reward delays on responses of dopamine  
825 neurons. *The Journal of Neuroscience: The Official Journal of the Society for Neuroscience*,  
826 28(31), 7837–7846. <https://doi.org/10.1523/JNEUROSCI.1600-08.2008>
- 827 Lee, N. C., de Groot, R. H. M., Boschloo, A., Dekker, S., Krabbendam, L., & Jolles, J. (2013).  
828 Age and educational track influence adolescent discounting of delayed rewards. *Frontiers in*  
829 *Psychology*, 4. <https://doi.org/10.3389/fpsyg.2013.00993>
- 830 Li, N., Ma, N., Liu, Y., He, X.-S., Sun, D.-L., Fu, X.-M., ... Zhang, D.-R. (2013). Resting-state  
831 functional connectivity predicts impulsivity in economic decision-making. *The Journal of*  
832 *Neuroscience: The Official Journal of the Society for Neuroscience*, 33(11), 4886–4895.  
833 <https://doi.org/10.1523/JNEUROSCI.1342-12.2013>
- 834 Luciana, M., & Collins, P. F. (2012). Incentive Motivation, Cognitive Control, and the  
835 Adolescent Brain: Is It Time for a Paradigm Shift? *Child Development Perspectives*, 6(4), 392–  
836 399. <https://doi.org/10.1111/j.1750-8606.2012.00252.x>
- 837 Miranda-Dominguez, O., Mills, B. D., Grayson, D., Woodall, A., Grant, K. A., Kroenke, C. D.,  
838 & Fair, D. A. (2014). Bridging the gap between the human and macaque connectome: a  
839 quantitative comparison of global interspecies structure-function relationships and network  
840 topology. *The Journal of Neuroscience: The Official Journal of the Society for Neuroscience*,  
841 34(16), 5552–5563. <https://doi.org/10.1523/JNEUROSCI.4229-13.2014>
- 842 Mitchell, S. H., Wilson, V. B., & Karalunas, S. L. (2015). Comparing hyperbolic, delay-amount  
843 sensitivity and present-bias models of delay discounting. *Behavioural Processes*, 114, 52–62.  
844 <https://doi.org/10.1016/j.beproc.2015.03.006>
- 845 Myerson, J., & Green, L. (1995). Discounting of delayed rewards: Models of individual choice.  
846 *Journal of the Experimental Analysis of Behavior*, 64(3), 263–276.  
847 <https://doi.org/10.1901/jeab.1995.64-263>
- 848 Myerson, J., Green, L., & Warusawitharana, M. (2001). Area under the curve as a measure of  
849 discounting. *Journal of the Experimental Analysis of Behavior*, 76(2), 235–243.  
850 <https://doi.org/10.1901/jeab.2001.76-235>
- 851 Odum, A. L. (2011). Delay Discounting: I’m a k, You’re a k. *Journal of the Experimental*  
852 *Analysis of Behavior*, 96(3), 427–439. <https://doi.org/10.1901/jeab.2011.96-423>

- 853 Olson, E. A., Collins, P. F., Hooper, C. J., Muetzel, R., Lim, K. O., & Luciana, M. (2009). White  
854 Matter Integrity Predicts Delay Discounting Behavior in 9- to 23-Year-Olds: A Diffusion Tensor  
855 Imaging Study. *Journal of Cognitive Neuroscience*, *21*(7), 1406–1421.  
856 <https://doi.org/10.1162/jocn.2009.21107>
- 857 Peters, J., & Büchel, C. (2010). Episodic future thinking reduces reward delay discounting  
858 through an enhancement of prefrontal-mediotemporal interactions. *Neuron*, *66*(1), 138–148.  
859 <https://doi.org/10.1016/j.neuron.2010.03.026>
- 860 Peters, J., & Büchel, C. (2011). The neural mechanisms of inter-temporal decision-making:  
861 understanding variability. *Trends in Cognitive Sciences*, *15*(5), 227–239.  
862 <https://doi.org/10.1016/j.tics.2011.03.002>
- 863 Pine, A., Shiner, T., Seymour, B., & Dolan, R. J. (2010). Dopamine, Time, and Impulsivity in  
864 Humans. *Journal of Neuroscience*, *30*(26), 8888–8896.  
865 <https://doi.org/10.1523/JNEUROSCI.6028-09.2010>
- 866 Power, J. D., Barnes, K. A., Snyder, A. Z., Schlaggar, B. L., & Petersen, S. E. (2012). Spurious  
867 but systematic correlations in functional connectivity MRI networks arise from subject motion.  
868 *NeuroImage*, *59*(3), 2142–2154. <https://doi.org/10.1016/j.neuroimage.2011.10.018>
- 869 Power, J. D., Mitra, A., Laumann, T. O., Snyder, A. Z., Schlaggar, B. L., & Petersen, S. E.  
870 (2014). Methods to detect, characterize, and remove motion artifact in resting state fMRI.  
871 *NeuroImage*, *84*, 320–341. <https://doi.org/10.1016/j.neuroimage.2013.08.048>
- 872 Power, J. D., Schlaggar, B. L., & Petersen, S. E. (2014). Studying Brain Organization via  
873 Spontaneous fMRI Signal. *Neuron*, *84*(4), 681–696.  
874 <https://doi.org/10.1016/j.neuron.2014.09.007>
- 875 Puig-Antich, J., & Ryan, N. (1986). *Schedule for Affective Disorders and Schizophrenia for*  
876 *School-Age Children*. Pittsburgh, PA: Western Psychiatric Institute and Clinic.
- 877 Richards, J. B., Zhang, L., Mitchell, S. H., & de Wit, H. (1999). Delay or probability discounting  
878 in a model of impulsive behavior: effect of alcohol. *Journal of the Experimental Analysis of*  
879 *Behavior*, *71*(2), 121–143. <https://doi.org/10.1901/jeab.1999.71-121>
- 880 Sadaghiani, S., & Kleinschmidt, A. (2013). Functional interactions between intrinsic brain  
881 activity and behavior. *NeuroImage*, *80*, 379–386.  
882 <https://doi.org/10.1016/j.neuroimage.2013.04.100>
- 883 Scheres, A., de Water, E., & Mies, G. W. (2013). The neural correlates of temporal reward  
884 discounting. *Wiley Interdisciplinary Reviews. Cognitive Science*, *4*(5), 523–545.  
885 <https://doi.org/10.1002/wcs.1246>

- 886 Scheres, A., Tontsch, C., Thoeny, A. L., & Sumiya, M. (2014). Temporal reward discounting in  
887 children, adolescents, and emerging adults during an experiential task. *Developmental*  
888 *Psychology*, 5, 711. <https://doi.org/10.3389/fpsyg.2014.00711>
- 889 Smith, S. M., Jenkinson, M., Woolrich, M. W., Beckmann, C. F., Behrens, T. E. J., Johansen-  
890 Berg, H., ... Matthews, P. M. (2004). Advances in functional and structural MR image analysis  
891 and implementation as FSL. *NeuroImage*, 23 Suppl 1, S208-219.  
892 <https://doi.org/10.1016/j.neuroimage.2004.07.051>
- 893 Stafford, J. M., Jarrett, B. R., Miranda-Dominguez, O., Mills, B. D., Cain, N., Mihalas, S., ...  
894 Fair, D. A. (2014). Large-scale topology and the default mode network in the mouse  
895 connectome. *Proceedings of the National Academy of Sciences of the United States of America*,  
896 111(52), 18745–18750. <https://doi.org/10.1073/pnas.1404346111>
- 897 Steinberg, L., Graham, S., O'Brien, L., Woolard, J., Cauffman, E., & Banich, M. (2009). Age  
898 differences in future orientation and delay discounting. *Child Development*, 80(1), 28–44.  
899 <https://doi.org/10.1111/j.1467-8624.2008.01244.x>
- 900 van den Bos, W., & McClure, S. M. (2013). Towards a general model of temporal discounting.  
901 *Journal of the Experimental Analysis of Behavior*, 99(1), 58–73. <https://doi.org/10.1002/jeab.6>
- 902 van den Bos, W., Rodriguez, C. A., Schweitzer, J. B., & McClure, S. M. (2014). Connectivity  
903 Strength of Dissociable Striatal Tracts Predict Individual Differences in Temporal Discounting.  
904 *The Journal of Neuroscience*, 34(31), 10298–10310. [https://doi.org/10.1523/JNEUROSCI.4105-](https://doi.org/10.1523/JNEUROSCI.4105-13.2014)  
905 13.2014
- 906 van den Bos, W., Rodriguez, C. A., Schweitzer, J. B., & McClure, S. M. (2015). Adolescent  
907 impatience decreases with increased frontostriatal connectivity. *Proceedings of the National*  
908 *Academy of Sciences*, 112(29), E3765–E3774. <https://doi.org/10.1073/pnas.1423095112>
- 909 Volkow, N. D., & Baler, R. D. (2015). NOW vs LATER brain circuits: implications for obesity  
910 and addiction. *Trends in Neurosciences*, 38(6), 345–352.  
911 <https://doi.org/10.1016/j.tins.2015.04.002>
- 912 Wang, S., Zhou, M., Chen, T., Yang, X., Chen, G., & Gong, Q. (2017). Delay discounting is  
913 associated with the fractional amplitude of low-frequency fluctuations and resting-state  
914 functional connectivity in late adolescence. *Scientific Reports*, 7(1), 10276.  
915 <https://doi.org/10.1038/s41598-017-11109-z>
- 916 Wechsler, D. (2003). *Wechsler Intelligence Scale for Children, 4th ed., (WISC-IV) technical and*  
917 *interpretive manual*. San Antonio, TX: Harcourt Brace.
- 918 Woolrich, M. W., Jbabdi, S., Patenaude, B., Chappell, M., Makni, S., Behrens, T., ... Smith, S.

- 919 M. (2009). Bayesian analysis of neuroimaging data in FSL. *NeuroImage*, 45(1 Suppl), S173-186.  
920 <https://doi.org/10.1016/j.neuroimage.2008.10.055>
- 921 Yi, R., Pitcock, J. A., Landes, R. D., & Bickel, W. K. (2010). The short of it: abbreviating the  
922 temporal discounting procedure. *Experimental and Clinical Psychopharmacology*, 18(4), 366–  
923 374. <https://doi.org/10.1037/a0019904>
- 924
